---

# Nucleic Acids Research

---

## Contents

Volume 37, Database issue, January 2009

---

|          |                                                                                                                                       |                                                                                                                                                                                                                                                                                                                                                                                                |         |
|----------|---------------------------------------------------------------------------------------------------------------------------------------|------------------------------------------------------------------------------------------------------------------------------------------------------------------------------------------------------------------------------------------------------------------------------------------------------------------------------------------------------------------------------------------------|---------|
|          | <b><i>Nucleic Acids Research</i> annual Database Issue and the NAR online Molecular Biology Database Collection in 2009</b>           | M.Y.Galperin and G.R.Cochrane                                                                                                                                                                                                                                                                                                                                                                  | D1–D4   |
|          | <b>Database resources of the National Center for Biotechnology Information</b>                                                        | E.W.Sayers, T.Barrett, D.A.Benson, S.H.Bryant, K.Canese, V.Chetvermin, D.M.Church, M.DiCuccio, R.Edgar, S.Federhen, M.Feolo, L.Y.Geer, W.Helmberg, Y.Kapustin, D.Landsman, D.J.Lipman, T.L.Madden, D.R.Maglott, V.Miller, I.Mizrachi, J.Ostell, K.D.Pruitt, G.D.Schuler, E.Sequeira, S.T.Sherry, M.Shumway, K.Sirotkin, A.Souvorov, G.Starchenko, T.A.Tatusova, L.Wagner, E.Yaschenko and J.Ye | D5–D15  |
|          | <b>DDBJ dealing with mass data produced by the second generation sequencer</b>                                                        | H.Sugawara, K.Ikeo, S.Fukuchi, T.Gojobori and Y.Tateno                                                                                                                                                                                                                                                                                                                                         | D16–D18 |
|          | <b>Petabyte-scale innovations at the European Nucleotide Archive</b>                                                                  | G.Cochrane, R.Akhtar, J.Bonfield, L.Bower, F.Demiralp, N.Faruque, R.Gibson, G.Hoad, T.Hubbard, C.Hunter, M.Jang, S.Juhos, R.Leinonen, S.Leonard, Q.Lin, R.Lopez, D.Lorenc, H.McWilliam, G.Mukherjee, S.Plaister, R.Radhakrishnan, S.Robinson, S.Sobhany, P.T.Hoopen, R.Vaughan, V.Zalunin and E.Birney                                                                                         | D19–D25 |
|          | <b>GenBank</b>                                                                                                                        | D.A.Benson, I.Karsch-Mizrachi, D.J.Lipman, J.Ostell and E.W.Sayers                                                                                                                                                                                                                                                                                                                             | D26–D31 |
|          | <b>NCBI Reference Sequences: current status, policy and new initiatives</b>                                                           | K.D.Pruitt, T.Tatusova, W.Klimke and D.R.Maglott                                                                                                                                                                                                                                                                                                                                               | D32–D36 |
| <b>S</b> | <b>DiProDB: a database for dinucleotide properties</b>                                                                                | M.Friedel, S.Nikolajewa, J.Sühnel and T.Wilhelm                                                                                                                                                                                                                                                                                                                                                | D37–D40 |
|          | <b>UCbase &amp; miRfunc: a database of ultraconserved sequences and microRNA function</b>                                             | C.Taccioli, E.Fabbri, R.Visone, S.Volinia, G.A.Calin, L.Y.Fong, R.Gambari, A.Bottoni, M.Acunzo, J.Hagan, M.V.Iorio, C.Piovan, G.Romano and C.M.Croce                                                                                                                                                                                                                                           | D41–D48 |
|          | <b>MachiBase: a <i>Drosophila melanogaster</i> 5'-end mRNA transcription database</b>                                                 | B.Ahsan, T.L.Saito, S.-i.Hashimoto, K.Muramatsu, M.Tsuda, A.Sasaki, K.Matsushima, T.Aigaki and S.Morishita                                                                                                                                                                                                                                                                                     | D49–D53 |
| <b>S</b> | <b>The PAZAR database of gene regulatory information coupled to the ORCA toolkit for the study of regulatory sequences</b>            | E.Portales-Casamar, D.Arenillas, J.Lim, M.I.Swanson, S.Jiang, A.McCallum, S.Kirov and W.W.Wasserman                                                                                                                                                                                                                                                                                            | D54–D60 |
|          | <b>PRODORIC (release 2009): a database and tool platform for the analysis of gene regulation in prokaryotes</b>                       | A.Grote, J.Klein, I.Retter, I.Haddad, S.Behling, B.Bunk, I.Biegler, S.Yarmolinetz, D.Jahn and R.Münch                                                                                                                                                                                                                                                                                          | D61–D65 |
| <b>S</b> | <b>PTM-Switchboard—a database of posttranslational modifications of transcription factors, the mediating enzymes and target genes</b> | L.Everett, A.Vo and S.Hannenhalli                                                                                                                                                                                                                                                                                                                                                              | D66–D71 |

*Continued*

|          |                                                                                                                  |                                                                                                                                         |           |
|----------|------------------------------------------------------------------------------------------------------------------|-----------------------------------------------------------------------------------------------------------------------------------------|-----------|
|          | <b>Transterm: a database to aid the analysis of regulatory sequences in mRNAs</b>                                | G.H.Jacobs, A.Chen, S.G.Stevens, P.A.Stockwell, M.A.Black, W.P.Tate and C.M.Brown                                                       | D72–D76   |
|          | <b>UniPROBE: an online database of protein binding microarray data on protein–DNA interactions</b>               | D.E.Newburger and M.L.Bulyk                                                                                                             | D77–D82   |
|          | <b>BPS: a database of RNA base-pair structures</b>                                                               | Y.Xin and W.K.Olson                                                                                                                     | D83–D88   |
|          | <b>The Functional RNA Database 3.0: databases to support mining and annotation of functional RNAs</b>            | T.Mituyama, K.Yamada, E.Hattori, H.Okida, Y.Ono, G.Terai, A.Yoshizawa, T.Komori and K.Asai                                              | D89–D92   |
|          | <b>GtRNAdb: a database of transfer RNA genes detected in genomic sequence</b>                                    | P.P.Chan and T.M.Lowe                                                                                                                   | D93–D97   |
|          | <b>miR2Disease: a manually curated database for microRNA deregulation in human disease</b>                       | Q.Jiang, Y.Wang, Y.Hao, L.Juan, M.Teng, X.Zhang, M.Li, G.Wang and Y.Liu                                                                 | D98–D104  |
|          | <b>miRecords: an integrated resource for microRNA–target interactions</b>                                        | F.Xiao, Z.Zuo, G.Cai, S.Kang, X.Gao and T.Li                                                                                            | D105–D110 |
|          | <b>miOrtho: computational survey of microRNA genes</b>                                                           | D.Gerlach, E.V.Kriventseva, N.Rahman, C.E.Vejnar and E.M.Zdobnov                                                                        | D111–D117 |
|          | <b>MODOMICS: a database of RNA modification pathways. 2008 update</b>                                            | A.Czerwoniec, S.Dunin-Horkawicz, E.Purta, K.H.Kaminska, J.M.Kasprzak, J.M.Bujnicki, H.Grosjean and K.Rother                             | D118–D121 |
| <b>S</b> | <b>NRED: a database of long noncoding RNA expression</b>                                                         | M.E.Dinger, K.C.Pang, T.R.Mercer, M.L.Crowe, S.M.Grimmond and J.S.Mattick                                                               | D122–D126 |
|          | <b>PseudoBase ++: an extension of PseudoBase for easy searching, formatting and visualization of pseudoknots</b> | M.Taufer, A.Licon, R.Araiza, D.Mireles, F.H.D.van Batenburg, A.P.Gulyaev and M.-Y.Leung                                                 | D127–D135 |
|          | <b>Rfam: updates to the RNA families database</b>                                                                | P.P.Gardner, J.Daub, J.G.Tate, E.P.Nawrocki, D.L.Kolbe, S.Lindgreen, A.C.Wilkinson, R.D.Finn, S.Griffiths-Jones, S.R.Eddy and A.Bateman | D136–D140 |
|          | <b>The Ribosomal Database Project: improved alignments and new tools for rRNA analysis</b>                       | J.R.Cole, Q.Wang, E.Cardenas, J.Fish, B.Chai, R.J.Farris, A.S.Kulam-Syed-Mohideen, D.M.McGarrell, T.Marsh, G.M.Garrity and J.M.Tiedje   | D141–D145 |
|          | <b>siRecords: a database of mammalian RNAi experiments and efficacies</b>                                        | Y.Ren, W.Gong, H.Zhou, Y.Wang, F.Xiao and T.Li                                                                                          | D146–D149 |
| <b>S</b> | <b>sRNAMap: genomic maps for small non-coding RNAs, their regulators and their targets in microbial genomes</b>  | H.-Y.Huang, H.-Y.Chang, C.-H.Chou, C.-P.Tseng, S.-Y.Ho, C.-D.Yang, Y.-W.Ju and H.-D.Huang                                               | D150–D154 |
|          | <b>The database of experimentally supported targets: a functional update of TarBase</b>                          | G.L.Papadopoulos, M.Reczko, V.A.Simossis, P.Sethupathy and A.G.Hatzigeorgiou                                                            | D155–D158 |
|          | <b>tRNAdb 2009: compilation of tRNA sequences and tRNA genes</b>                                                 | F.Jühling, M.Mörl, R.K.Hartmann, M.Sprinzi, P.F.Stadler and J.Pütz                                                                      | D159–D162 |
| <b>S</b> | <b>tRNADB-CE: tRNA gene database curated manually by experts</b>                                                 | T.Abe, T.Ikemura, Y.Ohara, H.Uehara, M.Kinouchi, S.Kanaya, Y.Yamada, A.Muto and H.Inokuchi                                              | D163–D168 |
|          | <b>The Universal Protein Resource (UniProt) 2009</b>                                                             | The UniProt Consortium                                                                                                                  | D169–D174 |
|          | <b>CentrosomeDB: a human centrosomal proteins database</b>                                                       | R.Nogales-Cadenas, F.Abascal, J.Díez-Pérez, J.M.Carazo and A.Pascual-Montano                                                            | D175–D180 |
|          | <b>NOPdb: Nucleolar Proteome Database—2008 update</b>                                                            | Y.Ahmad, F.-M.Boisvert, P.Gregor, A.Cobley and A.I.Lamond                                                                               | D181–D184 |

*Continued*

|          |                                                                                                                          |                                                                                                                                                                                                                                                                                                                                                                                                                  |           |
|----------|--------------------------------------------------------------------------------------------------------------------------|------------------------------------------------------------------------------------------------------------------------------------------------------------------------------------------------------------------------------------------------------------------------------------------------------------------------------------------------------------------------------------------------------------------|-----------|
|          | <b>Minimotif miner 2nd release: a database and web system for motif search</b>                                           | S.Rajasekaran, S.Balla, P.Gradie, M.R.Gryk, K.Kadaveru, V.Kundeti, M.W.Maciejewski, T.Mi, N.Rubino, J.Vyas and M.R.Schiller                                                                                                                                                                                                                                                                                      | D185–D190 |
|          | <b>SDR: a database of predicted specificity-determining residues in proteins</b>                                         | J.E.Donald and E.I.Shakhnovich                                                                                                                                                                                                                                                                                                                                                                                   | D191–D194 |
|          | <b>SuperSite: dictionary of metabolite and drug binding sites in proteins</b>                                            | R.A.Bauer, S.Günther, D.Jansen, C.Heeger, P.F.Thaben and R.Preissner                                                                                                                                                                                                                                                                                                                                             | D195–D200 |
|          | <b>TMFunction: database for functional residues in membrane proteins</b>                                                 | M.M.Gromiha, Y.Yabuki, M.X.Suresh, A.M.Thangakani, M.Suwa and K.Fukui                                                                                                                                                                                                                                                                                                                                            | D201–D204 |
|          | <b>CDD: specific functional annotation with the Conserved Domain Database</b>                                            | A.Marchler-Bauer, J.B.Anderson, F.Chitsaz, M.K.Derbyshire, C.DeWeese-Scott, J.H.Fong, L.Y.Geer, R.C.Geer, N.R.Gonzales, M.Gwadz, S.He, D.I.Hurwitz, J.D.Jackson, Z.Ke, C.J.Lanczycki, C.A.Liebert, C.Liu, F.Lu, S.Lu, G.H.Marchler, M.Mullochandov, J.S.Song, A.Tasneem, N.Thanki, R.A.Yamashita, D.Zhang, N.Zhang and S.H.Bryant                                                                                | D205–D210 |
|          | <b>InterPro: the integrative protein signature database</b>                                                              | S.Hunter, R.Apweiler, T.K.Attwood, A.Bairoch, A.Bateman, D.Binns, P.Bork, U.Das, L.Daugherty, L.Duquenne, R.D.Finn, J.Gough, D.Haft, N.Hulo, D.Kahn, E.Kelly, A.Laugraud, I.Letunic, D.Lonsdale, R.Lopez, M.Madera, J.Maslen, C.McAnulla, J.McDowall, J.Mistry, A.Mitchell, N.Mulder, D.Natale, C.Orengo, A.F.Quinn, J.D.Selengut, C.J.A.Sigrist, M.Thimma, P.D.Thomas, F.Valentin, D.Wilson, C.H.Wu and C.Yeats | D211–D215 |
| <b>S</b> | <b>The National Center for Biotechnology Information's Protein Clusters Database</b>                                     | W.Klimke, R.Agarwala, A.Badretdin, S.Chetvernin, S.Ciufo, B.Fedorov, B.Kiryutin, K.O'Neill, W.Resch, S.Resenchuk, S.Schafer, I.Tolstoy and T.Tatusova                                                                                                                                                                                                                                                            | D216–D223 |
|          | <b>Protein segment finder: an online search engine for segment motifs in the PDB</b>                                     | A.O.Samson and M.Levitt                                                                                                                                                                                                                                                                                                                                                                                          | D224–D228 |
|          | <b>SMART 6: recent updates and new developments</b>                                                                      | I.Letunic, T.Doerks and P.Bork                                                                                                                                                                                                                                                                                                                                                                                   | D229–D232 |
|          | <b>The Carbohydrate-Active EnZymes database (CAZy): an expert resource for Glycogenomics</b>                             | B.L.Cantarel, P.M.Coutinho, C.Rancurel, T.Bernard, V.Lombard and B.Henrissat                                                                                                                                                                                                                                                                                                                                     | D233–D238 |
|          | <b>The Degradome database: mammalian proteases and diseases of proteolysis</b>                                           | V.Quesada, G.R.Ordóñez, L.M.Sánchez, X.S.Puente and C.López-Otín                                                                                                                                                                                                                                                                                                                                                 | D239–D243 |
|          | <b>Kinomer v. 1.0: a database of systematically classified eukaryotic protein kinases</b>                                | D.M.A.Martin, D.Miranda-Saavedra and G.J.Barton                                                                                                                                                                                                                                                                                                                                                                  | D244–D250 |
| <b>S</b> | <b>OKCAM: an ontology-based, human-centered knowledgebase for cell adhesion molecules</b>                                | C.-Y.Li, Q.-R.Liu, P.-W.Zhang, X.-M.Li, L.Wei and G.R.Uhl                                                                                                                                                                                                                                                                                                                                                        | D251–D260 |
|          | <b>PeroxiBase: a database with new tools for peroxidase family classification</b>                                        | D.Koua, L.Cerutti, L.Falquet, C.J.A.Sigrist, G.Theiler, N.Hulo and C.Dunand                                                                                                                                                                                                                                                                                                                                      | D261–D266 |
|          | <b>SysZNF: the C2H2 zinc finger gene database</b>                                                                        | G.Ding, P.Lorenz, M.Kreutzer, Y.Li and H.-J.Thiesen                                                                                                                                                                                                                                                                                                                                                              | D267–D273 |
|          | <b>The Transporter Classification Database: recent advances</b>                                                          | M.H.Saier Jr, M.R.Yen, K.Noto, D.G.Tamang and C.Elkan                                                                                                                                                                                                                                                                                                                                                            | D274–D278 |
|          | <b>Zinc Finger Database (ZiFDB): a repository for information on C2H2 zinc fingers and engineered zinc-finger arrays</b> | F.Fu, J.D.Sander, M.Maeder, S.Thibodeau-Beganny, J.K.Joung, D.Dobbs, L.Miller and D.F.Voytas                                                                                                                                                                                                                                                                                                                     | D279–D283 |

*Continued*

|          |                                                                                                                                               |                                                                                                                                                                                      |           |
|----------|-----------------------------------------------------------------------------------------------------------------------------------------------|--------------------------------------------------------------------------------------------------------------------------------------------------------------------------------------|-----------|
| <b>S</b> | <b>MMsINC: a large-scale chemoinformatics database</b>                                                                                        | J.Masciocchi, G.Frau, M.Fanton, M.Sturlese, M.Floris, L.Pireddu, P.Palla, F.Cedrati, P.Rodriguez-Tomé and S.Moro                                                                     | D284–D290 |
|          | <b>SuperScent—a database of flavors and scents</b>                                                                                            | M.Dunkel, U.Schmidt, S.Struck, L.Berger, B.Gruening, J.Hossbach, I.S.Jaeger, U.Effmert, B.Piechulla, R.Eriksson, J.Knudsen and R.Preissner                                           | D291–D294 |
|          | <b>SuperToxic: a comprehensive database of toxic compounds</b>                                                                                | U.Schmidt, S.Struck, B.Gruening, J.Hossbach, I.S.Jaeger, R.Parol, U.Lindequist, E.Teuscher and R.Preissner                                                                           | D295–D299 |
|          | <b>3did Update: domain–domain and peptide-mediated interactions of known 3D structure</b>                                                     | A.Stein, A.Panjkovich and P.Aloy                                                                                                                                                     | D300–D304 |
|          | <b>AS-ALPS: a database for analyzing the effects of alternative splicing on protein structure, interaction and network in human and mouse</b> | M.Shionyu, A.Yamaguchi, K.Shinoda, K.-i.Takahashi and M.Go                                                                                                                           | D305–D309 |
|          | <b>The CATH classification revisited—architectures reviewed and new ways to characterize structural divergence in superfamilies</b>           | A.L.Cuff, I.Sillitoe, T.Lewis, O.C.Redfern, R.Garratt, J.Thornton and C.A.Orengo                                                                                                     | D310–D314 |
|          | <b>CC+: a relational database of coiled-coil structures</b>                                                                                   | O.D.Testa, E.Moutevelis and D.N.Woolfson                                                                                                                                             | D315–D322 |
| <b>S</b> | <b>The ConSurf-DB: pre-calculated evolutionary conservation profiles of protein structures</b>                                                | O.Goldenberg, E.Erez, G.Nimrod and N.Ben-Tal                                                                                                                                         | D323–D327 |
| <b>S</b> | <b>CPDB: a database of circular permutation in proteins</b>                                                                                   | W.-C.Lo, C.-C.Lee, C.-Y.Lee and P.-C.Lyu                                                                                                                                             | D328–D332 |
|          | <b>The GTOP database in 2009: updated content and novel features to expand and deepen insights into protein structures and functions</b>      | S.Fukuchi, K.Homma, S.Sakamoto, H.Sugawara, Y.Tateno, T.Gojobori and K.Nishikawa                                                                                                     | D333–D337 |
|          | <b>JAIL: a structure-based interface library for macromolecules</b>                                                                           | S.Günther, J.von Eichborn, P.May and R.Preissner                                                                                                                                     | D338–D341 |
|          | <b>KineticDB: a database of protein folding kinetics</b>                                                                                      | N.S.Bogatyreva, A.A.Osypov and D.N.Ivankov                                                                                                                                           | D342–D346 |
|          | <b>MODBASE, a database of annotated comparative protein structure models and associated resources</b>                                         | U.Pieper, N.Eswar, B.M.Webb, D.Eramian, L.Kelly, D.T.Barkan, H.Carter, P.Mankoo, R.Karchin, M.A.Marti-Renom, F.P.Davis and A.Sali                                                    | D347–D354 |
|          | <b>PDBsum new things</b>                                                                                                                      | R.A.Laskowski                                                                                                                                                                        | D355–D359 |
|          | <b>PiSite: a database of protein interaction sites using multiple binding states in the PDB</b>                                               | M.Higurashi, T.Ishida and K.Kinoshita                                                                                                                                                | D360–D364 |
|          | <b>The protein structure initiative structural genomics knowledgebase</b>                                                                     | H.M.Berman, J.D.Westbrook, M.J.Gabanyi, W.Tao, R.Shah, A.Kouranov, T.Schwede, K.Arnold, F.Kiefer, L.Bordoli, J.Kopp, M.Podvynec, P.D.Adams, L.G.Carter, W.Minor, R.Nair and J.L.Baer | D365–D368 |
|          | <b>RsiteDB: a database of protein binding pockets that interact with RNA nucleotide bases</b>                                                 | A.Shulman-Peleg, R.Nussinov and H.J.Wolfson                                                                                                                                          | D369–D373 |
| <b>S</b> | <b>SPROUTS: a database for the evaluation of protein stability upon point mutation</b>                                                        | M.Lonquety, Z.Lacroix, N.Papandreou and J.Chomilier                                                                                                                                  | D374–D379 |
| <b>S</b> | <b>SUPERFAMILY—sophisticated comparative genomics, data mining, visualization and phylogeny</b>                                               | D.Wilson, R.Pethica, Y.Zhou, C.Talbot, C.Vogel, M.Madera, C.Chothia and J.Gough                                                                                                      | D380–D386 |
|          | <b>The SWISS-MODEL Repository and associated resources</b>                                                                                    | F.Kiefer, K.Arnold, M.Künzli, L.Bordoli and T.Schwede                                                                                                                                | D387–D392 |

*Continued*

|          |                                                                                                                                                  |                                                                                                                                                                                                           |           |
|----------|--------------------------------------------------------------------------------------------------------------------------------------------------|-----------------------------------------------------------------------------------------------------------------------------------------------------------------------------------------------------------|-----------|
|          | <b>Voronoi: analyzing packing in protein structures</b>                                                                                          | K.Rother, P.W.Hildebrand, A.Goede, B.Gruening and R.Preissner                                                                                                                                             | D393–D395 |
|          | <b>The GOA database in 2009—an integrated Gene Ontology Annotation resource</b>                                                                  | D.Barrell, E.Dimmer, R.P.Huntley, D.Binns, C.O'Donovan and R.Apweiler                                                                                                                                     | D396–D403 |
|          | <b>Selectome: a database of positive selection</b>                                                                                               | E.Proux, R.A.Studer, S.Moretti and M.Robinson-Rechavi                                                                                                                                                     | D404–D407 |
|          | <b>PEDANT covers all complete RefSeq genomes</b>                                                                                                 | M.C.Walter, T.Rattei, R.Arnold, U.Güldener, M.Münsterkötter, K.Nenova, G.Kastenmüller, P.Tischler, A.Wölling, A.Volz, N.Pongratz, R.Jost, H.-W.Mewes and D.Frushman                                       | D408–D411 |
|          | <b>STRING 8—a global view on proteins and their functional interactions in 630 organisms</b>                                                     | L.J.Jensen, M.Kuhn, M.Stark, S.Chaffron, C.Creevey, J.Muller, T.Doerks, P.Julien, A.Roth, M.Simonovic, P.Bork and C.von Mering                                                                            | D412–D416 |
| <b>S</b> | <b>Human immunodeficiency virus type 1, human protein interaction database at NCBI</b>                                                           | W.Fu, B.E.Sanders-Ber, K.S.Katz, D.R.Maglott, K.D.Pruitt and R.G.Ptak                                                                                                                                     | D417–D422 |
|          | <b>Influenza sequence and epitope database</b>                                                                                                   | S.Yang, J.-Y.Lee, J.S.Lee, W.P.Mitchell, H.-B.Oh, C.Kang and K.H.Kim                                                                                                                                      | D423–D430 |
| <b>S</b> | <b>The RNA Virus Database</b>                                                                                                                    | R.Belshaw, T.de Oliveira, S.Markowitz and A.Rambaut                                                                                                                                                       | D431–D435 |
|          | <b>VIPERdb<sup>2</sup>: an enhanced and web API enabled relational database for structural virology</b>                                          | M.Carrillo-Tripp, C.M.Shepherd, I.A.Borelli, S.Venkataraman, G.Lander, P.Natarajan, J.E.Johnson, C.L.Brooks III and V.S.Reddy                                                                             | D436–D442 |
|          | <b>ARDB—Antibiotic Resistance Genes Database</b>                                                                                                 | B.Liu and M.Pop                                                                                                                                                                                           | D443–D447 |
|          | <b>ATGC: a database of orthologous genes from closely related prokaryotic genomes and a research platform for microevolution of prokaryotes</b>  | P.S.Novichkov, I.Ratnere, Y.I.Wolf, E.V.Koonin and I.Dubchak                                                                                                                                              | D448–D454 |
|          | <b>DEG 5.0, a database of essential genes in both prokaryotes and eukaryotes</b>                                                                 | R.Zhang and Y.Lin                                                                                                                                                                                         | D455–D458 |
| <b>S</b> | <b>DOOR: a database for prokaryotic operons</b>                                                                                                  | F.Mao, P.Dam, J.Chou, V.Olman and Y.Xu                                                                                                                                                                    | D459–D463 |
|          | <b>EcoCyc: A comprehensive view of <i>Escherichia coli</i> biology</b>                                                                           | I.M.Keseler, C.Bonavides-Martínez, J.Collado-Vides, S.Gama-Castro, R.P.Gunsalus, D.A.Johnson, M.Krummenacker, L.M.Nolan, S.Paley, I.T.Paulsen, M.Peralta-Gil, A.Santos-Zavaleta, A.G.Shearer and P.D.Karp | D464–D470 |
|          | <b>HAMAP: a database of completely sequenced microbial proteome sets and manually curated microbial protein families in UniProtKB/Swiss-Prot</b> | T.Lima, A.H.Auchincloss, E.Coudert, G.Keller, K.Michoud, C.Rivoire, V.Bulliard, E.de Castro, C.Lachaize, D.Baratin, I.Phan, L.Bougueleret and A.Bairoch                                                   | D471–D478 |
|          | <b>OperonDB: a comprehensive database of predicted operons in microbial genomes</b>                                                              | M.Pertea, K.Ayanbule, M.Smedinghoff and S.L.Salzberg                                                                                                                                                      | D479–D482 |
|          | <b>Pseudomonas Genome Database: facilitating user-friendly, comprehensive comparisons of microbial genomes</b>                                   | G.L.Winsor, T.V.Rossum, R.Lo, B.Khaira, M.D.Whiteside, R.E.W.Hancock and F.S.L.Brinkman                                                                                                                   | D483–D488 |
|          | <b>rrnDB: documenting the number of rRNA and tRNA genes in bacteria and archaea</b>                                                              | Z.M.-P.Lee, C.Bussema III and T.M.Schmidt                                                                                                                                                                 | D489–D493 |

*Continued*

|          |                                                                                                                                                                              |                                                                                                                                                                                                                                                                                                                             |           |
|----------|------------------------------------------------------------------------------------------------------------------------------------------------------------------------------|-----------------------------------------------------------------------------------------------------------------------------------------------------------------------------------------------------------------------------------------------------------------------------------------------------------------------------|-----------|
|          | <b>Strepto-DB, a database for comparative genomics of group A (GAS) and B (GBS) streptococci, implemented with the novel database platform ‘Open Genome Resource’ (OGeR)</b> | J.Klein, R.Münch, I.Biegler, I.Haddad, I.Retter and D.Jahn                                                                                                                                                                                                                                                                  | D494–D498 |
|          | <b>TB database: an integrated platform for tuberculosis research</b>                                                                                                         | T.B.K.Reddy, R.Riley, F.Wymore, P.Montgomery, D.DeCaprio, R.Engels, M.Gellesch, J.Hubble, D.Jen, H.Jin, M.Koehrsen, L.Larson, M.Mao, M.Nitzberg, P.Sisk, C.Stolte, B.Weiner, J.White, Z.K.Zachariah, G.Sherlock, J.E.Galagan, C.A.Ball and G.K.Schoolnik                                                                    | D499–D508 |
| <b>S</b> | <b>Aspergillus Genomes and the Aspergillus Cloud</b>                                                                                                                         | J.E.Mabey Gilsean, G.Atherton, J.Bartholomew, P.F.Giles, T.K.Attwood, D.W.Denning and P.Bowyer                                                                                                                                                                                                                              | D509–D514 |
| <b>S</b> | <b>dictyBase—a <i>Dictyostelium</i> bioinformatics resource update</b>                                                                                                       | P.Fey, P.Gaudet, T.Curk, B.Zupan, E.M.Just, S.Basu, S.N.Merchant, Y.A.Bushmanova, G.Shaulsky, W.A.Kibbe and R.L.Chisholm                                                                                                                                                                                                    | D515–D519 |
|          | <b>Full-Malaria/Parasites and Full-Arthropods: databases of full-length cDNAs of parasites and arthropods, update 2009</b>                                                   | H.Wakaguri, Y.Suzuki, T.Katayama, S.Kawashima, E.Kibukawa, K.Hiranuka, M.Sasaki, S.Sugano and J.Watanabe                                                                                                                                                                                                                    | D520–D525 |
|          | <b>GiardiaDB and TrichDB: integrated genomic resources for the eukaryotic protist pathogens <i>Giardia lamblia</i> and <i>Trichomonas vaginalis</i></b>                      | C.Aurrecochea, J.Brestelli, B.P.Brunk, J.M.Carlton, J.Dommer, S.Fischer, B.Gajria, X.Gao, A.Gingle, G.Grant, O.S.Harb, M.Heiges, F.Innamorato, J.Iodice, J.C.Kissinger, E.Kraemer, W.Li, J.A.Miller, H.G.Morrison, V.Nayak, C.Pennington, D.F.Pinney, D.S.Roos, C.Ross, C.J.Stoeckert Jr, S.Sullivan, C.Treatman and H.Wang | D526–D530 |
| <b>S</b> | <b>metaTIGER: a metabolic evolution resource</b>                                                                                                                             | J.W.Whitaker, I.Letunic, G.A.McConkey and D.R.Westhead                                                                                                                                                                                                                                                                      | D531–D538 |
|          | <b>PlasmoDB: a functional genomic database for malaria parasites</b>                                                                                                         | C.Aurrecochea, J.Brestelli, B.P.Brunk, J.Dommer, S.Fischer, B.Gajria, X.Gao, A.Gingle, G.Grant, O.S.Harb, M.Heiges, F.Innamorato, J.Iodice, J.C.Kissinger, E.Kraemer, W.Li, J.A.Miller, V.Nayak, C.Pennington, D.F.Pinney, D.S.Roos, C.Ross, C.J.Stoeckert Jr, C.Treatman and H.Wang                                        | D539–D543 |
|          | <b>TcSNP: a database of genetic variation in <i>Trypanosoma cruzi</i></b>                                                                                                    | A.A.Ackermann, S.J.Carmona and F.Agüero                                                                                                                                                                                                                                                                                     | D544–D549 |
| <b>S</b> | <b>Génolevures: protein families and synteny among complete hemiascomycetous yeast proteomes and genomes</b>                                                                 | D.J.Sherman, T.Martin, M.Nikolski, C.Cayla, J.-L.Souciet and P.Durrens for the Génolevures Consortium                                                                                                                                                                                                                       | D550–D554 |
|          | <b>FlyBase: enhancing <i>Drosophila</i> Gene Ontology annotations</b>                                                                                                        | S.Tweedie, M.Ashburner, K.Falls, P.Leyland, P.McQuilton, S.Marygold, G.Millburn, D.Osumi-Sutherland, A.Schroeder, R.Seal, H.Zhang and The FlyBase Consortium                                                                                                                                                                | D555–D559 |
|          | <b>FlyEx, the quantitative atlas on segmentation gene expression at cellular resolution</b>                                                                                  | A.Pisarev, E.Poustelnikova, M.Samsonova and J.Reinitz                                                                                                                                                                                                                                                                       | D560–D566 |
| <b>S</b> | <b>FLYSNPdb: a high-density SNP database of <i>Drosophila melanogaster</i></b>                                                                                               | D.Chen, J.Berger, M.Fellner and T.Suzuki                                                                                                                                                                                                                                                                                    | D567–D570 |
| <b>S</b> | <b>Nematode.net update 2008: improvements enabling more efficient data mining and comparative nematode genomics</b>                                                          | J.Martin, S.Abubucker, T.Wylie, Y.Yin, Z.Wang and M.Mitrea                                                                                                                                                                                                                                                                  | D571–D578 |

*Continued*

|          |                                                                                               |                                                                                                                                                                                                                                                                                                                                                                                                |           |
|----------|-----------------------------------------------------------------------------------------------|------------------------------------------------------------------------------------------------------------------------------------------------------------------------------------------------------------------------------------------------------------------------------------------------------------------------------------------------------------------------------------------------|-----------|
|          | <b>SchistoDB: a <i>Schistosoma mansoni</i> genome resource</b>                                | A.Zerlotini, M.Heiges, H.Wang, R.L.V.Moraes, A.J.Dominitini, J.C.Ruiz, J.C.Kissinger and G.Oliveira                                                                                                                                                                                                                                                                                            | D579–D582 |
|          | <b>VectorBase: a data resource for invertebrate vector genomics</b>                           | D.Lawson, P.Arensburger, P.Atkinson, N.J.Besansky, R.V.Bruggner, R.Butler, K.S.Campbell, G.K.Christophides, S.Christley, E.Dialynas, M.Hammond, C.A.Hill, N.Konopinski, N.F.Lobo, R.M.MacCallum, G.Madey, K.Megy, J.Meyer, S.Redmond, D.W.Severson, E.O.Stinson, P.Topalis, E.Birney, W.M.Gelbart, F.C.Kafatos, C.Louis and F.H.Collins                                                        | D583–D587 |
|          | <b>BRENDA, AMENDA and FRENDA the enzyme information system: new content and tools in 2009</b> | A.Chang, M.Scheer, A.Grote, I.Schomburg and D.Schomburg                                                                                                                                                                                                                                                                                                                                        | D588–D592 |
|          | <b>ExplorEnz: the primary source of the IUBMB enzyme list</b>                                 | A.G.McDonald, S.Boyce and K.F.Tipton                                                                                                                                                                                                                                                                                                                                                           | D593–D597 |
|          | <b>Bionemo: molecular information on biodegradation metabolism</b>                            | G.Carbajosa, A.Trigo, A.Valencia and I.Cases                                                                                                                                                                                                                                                                                                                                                   | D598–D602 |
|          | <b>HMDB: a knowledgebase for the human metabolome</b>                                         | D.S.Wishart, C.Knox, A.C.Guo, R.Eisner, N.Young, B.Gautam, D.D.Hau, N.Psychogios, E.Dong, S.Bouatra, R.Mandal, I.Sinelnikov, J.Xia, L.Jia, J.A.Cruz, E.Lim, C.A.Sobsey, S.Shrivastava, P.Huang, P.Liu, L.Fang, J.Peng, R.Fradette, D.Cheng, D.Tzur, M.Clements, A.Lewis, A.D.Souza, A.Zuniga, M.Dawe, Y.Xiong, D.Clive, R.Greiner, A.Nazyrova, R.Shaykhutdinov, L.Li, H.J.Vogel and I.Forsythe | D603–D610 |
| <b>S</b> | <b>PMAP: databases for analyzing proteolytic events and pathways</b>                          | Y.Igarashi, E.Heureux, K.S.Doctor, P.Talwar, S.Gramatikova, K.Gramatikoff, Y.Zhang, M.Blinov, S.S.Ibragimova, S.Boyd, B.Ratnikov, P.Cieplak, A.Godzik, J.W.Smith, A.L.Osterman and A.M.Eroshkin                                                                                                                                                                                                | D611–D618 |
|          | <b>Reactome knowledgebase of human biological pathways and processes</b>                      | L.Matthews, G.Gopinath, M.Gillespie, M.Caudy, D.Croft, B.de Bono, P.Garapati, J.Hemish, H.Hermjakob, B.Jassal, A.Kanapin, S.Lewis, S.Mahajan, B.May, E.Schmidt, I.Vastrik, G.Wu, E.Birney, L.Stein and P.D'Eustachio                                                                                                                                                                           | D619–D622 |
| <b>S</b> | <b>ConsensusPathDB—a database for integrating human functional interaction networks</b>       | A.Kamburov, C.Wierling, H.Lehrach and R.Herwig                                                                                                                                                                                                                                                                                                                                                 | D623–D628 |
|          | <b>EcID. A database for the inference of functional interactions in <i>E. coli</i></b>        | E.Andres Leon, I.Ezkurdia, B.Garcia, A.Valencia and D.Juan                                                                                                                                                                                                                                                                                                                                     | D629–D635 |
|          | <b>Update of KDBI: Kinetic Data of Bio-molecular Interaction database</b>                     | P.Kumar, B.C.Han, Z.Shi, J.Jia, Y.P.Wang, Y.T.Zhang, L.Liang, Q.F.Liu, Z.L.Ji and Y.Z.Chen                                                                                                                                                                                                                                                                                                     | D636–D641 |
|          | <b>Michigan molecular interactions r2: from interacting proteins to pathways</b>              | V.G.Tarcea, T.Weymouth, A.Ade, A.Bookvich, J.Gao, V.Mahavisno, Z.Wright, A.Chapman, M.Jayapandian, A.Özgür, Y.Tian, J.Cavalcoli, B.Mirel, J.Patel, D.Radev, B.Athey, D.States and H.V.Jagadish                                                                                                                                                                                                 | D642–D646 |
|          | <b>PIG—the pathogen interaction gateway</b>                                                   | T.Driscoll, M.D.Dyer, T.M.Murali and B.W.Sobral                                                                                                                                                                                                                                                                                                                                                | D647–D650 |
|          | <b>PIPs: human protein–protein interaction prediction database</b>                            | M.D.McDowall, M.S.Scott and G.J.Barton                                                                                                                                                                                                                                                                                                                                                         | D651–D656 |

*Continued*

|          |                                                                                                                              |                                                                                                                                                                                                                                                                                                                                                                                                                                                                                                                                                                                                                                                             |           |
|----------|------------------------------------------------------------------------------------------------------------------------------|-------------------------------------------------------------------------------------------------------------------------------------------------------------------------------------------------------------------------------------------------------------------------------------------------------------------------------------------------------------------------------------------------------------------------------------------------------------------------------------------------------------------------------------------------------------------------------------------------------------------------------------------------------------|-----------|
| <b>S</b> | <b>UniHI 4: new tools for query, analysis and visualization of the human protein–protein interactome</b>                     | G.Chaurasia, S.Malhotra, J.Russ, S.Schnoegl, C.Hänig, E.E.Wanker and M.E.Futschik                                                                                                                                                                                                                                                                                                                                                                                                                                                                                                                                                                           | D657–D660 |
| <b>S</b> | <b>VirHostNet: a knowledge base for the management and the analysis of proteome-wide virus–host interaction networks</b>     | V.Navratil, B.de Chasse, L.Meyniel, S.Delmotte, C.Gautier, P.André, V.Lotteau and C.Rabourdin-Combe                                                                                                                                                                                                                                                                                                                                                                                                                                                                                                                                                         | D661–D668 |
|          | <b>VirusMINT: a viral protein interaction database</b>                                                                       | A.Chatr-aryamontri, A.Ceol, D.Peluso, A.Nardoza, S.Panni, F.Sacco, M.Tinti, A.Smolyar, L.Castagnoli, M.Vidal, M.E.Cusick and G.Cesareni                                                                                                                                                                                                                                                                                                                                                                                                                                                                                                                     | D669–D673 |
| <b>S</b> | <b>PID: the Pathway Interaction Database</b>                                                                                 | C.F.Schaefer, K.Anthony, S.Krupa, J.Buchoff, M.Day, T.Hannay and K.H.Buetow                                                                                                                                                                                                                                                                                                                                                                                                                                                                                                                                                                                 | D674–D679 |
| <b>S</b> | <b>IUPHAR-DB: the IUPHAR database of G protein-coupled receptors and ion channels</b>                                        | A.J.Harmar, R.A.Hills, E.M.Rosser, M.Jones, O.P.Buneman, D.R.Dunbar, S.D.Greenhill, V.A.Hale, J.L.Sharman, T.I.Bonner, W.A.Catterall, A.P.Davenport, P.Delagrang, C.T.Dollery, S.M.Foord, G.A.Gutman, V.Laudet, R.R.Neubig, E.H.Ohlstein, R.W.Olsen, J.Peters, J.-P.Pin, R.R.Ruffolo, D.B.Searls, M.W.Wright and M.Spedding                                                                                                                                                                                                                                                                                                                                 | D680–D685 |
|          | <b>CleanEST: a database of cleansed EST libraries</b>                                                                        | B.Lee and G.Shin                                                                                                                                                                                                                                                                                                                                                                                                                                                                                                                                                                                                                                            | D686–D689 |
|          | <b>Ensembl 2009</b>                                                                                                          | T.J.P.Hubbard, B.L.Aken, S.Ayling, B.Ballester, K.Beal, E.Bragin, S.Brent, Y.Chen, P.Clapham, L.Clarke, G.Coates, S.Fairley, S.Fitzgerald, J.Fernandez-Banet, L.Gordon, S.Graf, S.Haider, M.Hammond, R.Holland, K.Howe, A.Jenkinson, N.Johnson, A.Kahari, D.Keefe, S.Keenan, R.Kinsella, F.Kokocinski, E.Kulesha, D.Lawson, I.Longden, K.Megy, P.Meidl, B.Overduin, A.Parker, B.Pritchard, D.Rios, M.Schuster, G.Slater, D.Smedley, W.Spooner, G.Spudich, S.Trevanion, A.Vilella, J.Vogel, S.White, S.Wilder, A.Zadissa, E.Birney, F.Cunningham, V.Curwen, R.Durbin, X.M.Fernandez-Suarez, J.Herrero, A.Kasprzyk, G.Proctor, J.Smith, S.Searle and P.Flicek | D690–D697 |
|          | <b>EVOG: a database for evolutionary analysis of overlapping genes</b>                                                       | D.-S.Kim, C.-Y.Cho, J.-W.Huh, H.-S.Kim and H.-G.Cho                                                                                                                                                                                                                                                                                                                                                                                                                                                                                                                                                                                                         | D698–D702 |
| <b>S</b> | <b>ExDom: an integrated database for comparative analysis of the exon–intron structures of protein domains in eukaryotes</b> | A.Bhasi, P.Philip, V.Manikandan and P.Senapathy                                                                                                                                                                                                                                                                                                                                                                                                                                                                                                                                                                                                             | D703–D711 |
|          | <b>The Mouse Genome Database genotypes::phenotypes</b>                                                                       | J.A.Blake, C.J.Bult, J.T.Eppig, J.A.Kadin and J.E.Richardson                                                                                                                                                                                                                                                                                                                                                                                                                                                                                                                                                                                                | D712–D719 |
|          | <b>Mouse Phenome Database</b>                                                                                                | S.C.Grubb, T.P.Maddatu, C.J.Bult and M.A.Bogue                                                                                                                                                                                                                                                                                                                                                                                                                                                                                                                                                                                                              | D720–D730 |
|          | <b>PhyloPat: an updated version of the phylogenetic pattern database contains gene neighborhood</b>                          | T.Hulsen, P.M.A.Groenen, J.de Vlieg and W.Alkema                                                                                                                                                                                                                                                                                                                                                                                                                                                                                                                                                                                                            | D731–D737 |
| <b>S</b> | <b>Pseudofam: the pseudogene families database</b>                                                                           | H.Y.K.Lam, E.Khurana, G.Fang, P.Cayting, N.Carriero, K.-H.Cheung and M.B.Gerstein                                                                                                                                                                                                                                                                                                                                                                                                                                                                                                                                                                           | D738–D743 |
|          | <b>The Rat Genome Database 2009: variation, ontologies and pathways</b>                                                      | M.R.Dwinell, E.A.Worthey, M.Shimoyama, B.Bakir-Gungor, J.DePons, S.Laulederkind, T.Lowry, R.Nigram, V.Petri, J.Smith, A.Stoddard, S.N.Twigger, H.J.Jacob and the RGD Team                                                                                                                                                                                                                                                                                                                                                                                                                                                                                   | D744–D749 |

*Continued*

|          |                                                                                                                                             |                                                                                                                                                                                                                                                                                                                                                                                              |           |
|----------|---------------------------------------------------------------------------------------------------------------------------------------------|----------------------------------------------------------------------------------------------------------------------------------------------------------------------------------------------------------------------------------------------------------------------------------------------------------------------------------------------------------------------------------------------|-----------|
|          | <b>SpBase: the sea urchin genome database and web site</b>                                                                                  | R.A.Cameron, M.Samanta, A.Yuan, D.He and E.Davidson                                                                                                                                                                                                                                                                                                                                          | D750–D754 |
|          | <b>The UCSC Genome Browser Database: update 2009</b>                                                                                        | R.M.Kuhn, D.Karolchik, A.S.Zweig, T.Wang, K.E.Smith, K.R.Rosenbloom, B.Rhead, B.J.Raney, A.Pohl, M.Pheasant, L.Meyer, F.Hsu, A.S.Hinrichs, R.A.Harte, B.Giardine, P.Fujita, M.Diekhans, T.Dreszer, H.Clawson, G.P.Barber, D.Haussler and W.J.Kent                                                                                                                                            | D755–D761 |
|          | <b>Human Gene and Protein Database (HGPD): a novel database presenting a large quantity of experiment-based results in human proteomics</b> | Y.Maruyama, A.Wakamatsu, Y.Kawamura, K.Kimura, J.-i.Yamamoto, T.Nishikawa, Y.Kisu, S.Sugano, N.Goshima, T.Isogai and N.Nomura                                                                                                                                                                                                                                                                | D762–D766 |
|          | <b>Human Protein Reference Database—2009 update</b>                                                                                         | T.S.Keshava Prasad, R.Goel, K.Kandasamy, S.Keerthikumar, S.Kumar, S.Mathivanan, D.Telikicherla, R.Raju, B.Shafreen, A.Venugopal, L.Balakrishnan, A.Marimuthu, S.Banerjee, D.S.Somanathan, A.Sebastian, S.Rani, S.Ray, C.J.Harrys Kishore, S.Kanth, M.Ahmed, M.K.Kashyap, R.Mohmood, Y.L.Ramachandra, V.Krishna, B.A.Rahiman, S.Mohan, P.Ranganathan, S.Ramabadrnan, R.Chaerkady and A.Pandey | D767–D772 |
| <b>S</b> | <b>Human Proteinpedia: a unified discovery resource for proteomics research</b>                                                             | K.Kandasamy, S.Keerthikumar, R.Goel, S.Mathivanan, N.Patankar, B.Shafreen, S.Renuse, H.Pawar, Y.L.Ramachandra, P.K.Acharya, P.Ranganathan, R.Chaerkady, T.S.Keshava Prasad and A.Pandey                                                                                                                                                                                                      | D773–D781 |
|          | <b>BodyParts3D: 3D structure database for anatomical concepts</b>                                                                           | N.Mitsuhashi, K.Fujieda, T.Tamura, S.Kawamoto, T.Takagi and K.Okubo                                                                                                                                                                                                                                                                                                                          | D782–D785 |
|          | <b>Comparative Toxicogenomics Database: a knowledgebase and discovery tool for chemical–gene–disease networks</b>                           | A.P.Davis, C.G.Murphy, C.A.Saraceni-Richards, M.C.Rosenstein, T.C.Wiegers and C.J.Mattingly                                                                                                                                                                                                                                                                                                  | D786–D792 |
|          | <b>McKusick's Online Mendelian Inheritance in Man (OMIM®)</b>                                                                               | J.Amberger, C.A.Bocchini, A.F.Scott and A.Hamosh                                                                                                                                                                                                                                                                                                                                             | D793–D796 |
|          | <b>HGVbaseG2P: a central genetic association database</b>                                                                                   | G.A.Thorisson, O.Lancaster, R.C.Free, R.K.Hastings, P.Sarmah, D.Dash, S.K.Brahmachari and A.J.Brookes                                                                                                                                                                                                                                                                                        | D797–D802 |
| <b>S</b> | <b>SNPLogic: an interactive single nucleotide polymorphism selection, annotation, and prioritization system</b>                             | A.R.Pico, I.V.Smirnov, J.S.Chang, R.-F.Yeh, J.L.Wiemels, J.K.Wiencke, T.Tihan, B.R.Conklin and M.Wrens                                                                                                                                                                                                                                                                                       | D803–D809 |
|          | <b>VarySysDB: a human genetic polymorphism database based on all H-InvDB transcripts</b>                                                    | M.K.Shimada, R.Matsumoto, Y.Hayakawa, R.Sanbonmatsu, C.Gough, Y.Yamaguchi-Kabata, C.Yamasaki, T.Imanishi and T.Gojobori                                                                                                                                                                                                                                                                      | D810–D815 |
|          | <b>CTdatabase: a knowledge-base of high-throughput and curated data on cancer-testis antigens</b>                                           | L.G.Almeida, N.J.Sakabe, A.R.deOliveira, M.C.C.Silva, A.S.Mundstein, T.Cohen, Y.-T.Chen, R.Chua, S.Gurung, S.Gnjatic, A.A.Jungbluth, O.L.Caballero, A.Bairoch, E.Kiesler, S.L.White, A.J.G.Simpson, L.J.Old, A.A.Camargo and A.T.R.Vasconcelos                                                                                                                                               | D816–D819 |
|          | <b>Database for exploration of functional context of genes implicated in ovarian cancer</b>                                                 | M.Kaur, A.Radovanovic, M.Essack, U.Schaefer, M.Maquungo, T.Kibler, S.Schmeier, A.Christoffels, K.Narasimhan, M.Choolani and V.B.Bajic                                                                                                                                                                                                                                                        | D820–D823 |
| <b>S</b> | <b>MoKCa database—mutations of kinases in cancer</b>                                                                                        | C.J.Richardson, Q.Gao, C.Mitsopoulous, M.Zvelebil, L.H.Pearl and F.M.G.Pearl                                                                                                                                                                                                                                                                                                                 | D824–D831 |

*Continued*

|          |                                                                                                                                    |                                                                                                                                                                                                                                                                                                                                                                                                              |           |
|----------|------------------------------------------------------------------------------------------------------------------------------------|--------------------------------------------------------------------------------------------------------------------------------------------------------------------------------------------------------------------------------------------------------------------------------------------------------------------------------------------------------------------------------------------------------------|-----------|
| <b>S</b> | <b>AutDB: a gene reference resource for autism research</b>                                                                        | S.N.Basu, R.Kollu and S.Banerjee-Basu                                                                                                                                                                                                                                                                                                                                                                        | D832–D836 |
|          | <b>DNAREplication: a database of information and resources for the eukaryotic DNA replication community</b>                        | S.Cotterill and S.E.Kearsey                                                                                                                                                                                                                                                                                                                                                                                  | D837–D839 |
|          | <b>ERGR: An ethanol-related gene resource</b>                                                                                      | A.-Y.Guo, B.T.Webb, M.F.Miles, M.P.Zimmerman, K.S.Kendler and Z.Zhao                                                                                                                                                                                                                                                                                                                                         | D840–D845 |
|          | <b>G2Cdb: the Genes to Cognition database</b>                                                                                      | M.D.R.Croning, M.C.Marshall, P.McLaren, J.D.Armstrong and S.G.N.Grant                                                                                                                                                                                                                                                                                                                                        | D846–D851 |
| <b>S</b> | <b>INTERFEROME: the database of interferon regulated genes</b>                                                                     | S.A.Samarajiwa, S.Forster, K.Auchetl and P.J.Hertzog                                                                                                                                                                                                                                                                                                                                                         | D852–D857 |
|          | <b>MDPD: an integrated genetic information resource for Parkinson's disease</b>                                                    | S.Tang, Z.Zhang, G.Kavitha, E.-K.Tan and S.K.Ng                                                                                                                                                                                                                                                                                                                                                              | D858–D862 |
|          | <b>RAPID: Resource of Asian Primary Immunodeficiency Diseases</b>                                                                  | S.Keerthikumar, R.Raju, K.Kandasamy, A.Hijikata, S.Ramabadran, L.Balakrishnan, M.Ahmed, S.Rani, L.D.N.Selvan, D.S.Somanathan, S.Ray, M.Bhattacharjee, S.Gollapudi, Y.L.Ramachandra, S.Bhadra, C.Bhattacharyya, K.Imai, S.Nonoyama, H.Kanegane, T.Miyawaki, A.Pandey, O.Ohara and S.Mohan                                                                                                                     | D863–D867 |
|          | <b>ArrayExpress update—from an archive of functional genomics experiments to the atlas of gene expression</b>                      | H.Parkinson, M.Kapushesky, N.Kolesnikov, G.Rustici, M.Shojatalab, N.Abeygunawardena, H.Berube, M.Dylag, I.Emam, A.Farne, E.Holloway, M.Lukk, J.Malone, R.Mani, E.Pilicheva, T.F.Rayner, F.Rezwan, A.Sharma, E.Williams, X.Z.Bradley, T.Adamusiak, M.Brandizi, T.Burdett, R.Coulson, M.Krestyaninova, P.Kurnosov, E.Maguire, S.G.Neogi, P.Rocca-Serra, S.-A.Sansone, N.Sklyar, M.Zhao, U.Sarkans and A.Brazma | D868–D872 |
| <b>S</b> | <b>BloodExpress: a database of gene expression in mouse haematopoiesis</b>                                                         | D.Miranda-Saavedra, S.De, M.W.Trotter, S.A.Teichmann and B.Göttgens                                                                                                                                                                                                                                                                                                                                          | D873–D879 |
|          | <b>CleanEx: new data extraction and merging tools based on MeSH term annotation</b>                                                | V.Praz and P.Bucher                                                                                                                                                                                                                                                                                                                                                                                          | D880–D884 |
|          | <b>NCBI GEO: archive for high-throughput functional genomic data</b>                                                               | T.Barrett, D.B.Troup, S.E.Wilhite, P.Ledoux, D.Rudnev, C.Evangelista, I.F.Kim, A.Soboleva, M.Tomashevsky, K.A.Marshall, K.H.Phillippy, P.M.Sherman, R.N.Muertter and R.Edgar                                                                                                                                                                                                                                 | D885–D890 |
|          | <b>GermSAGE: a comprehensive SAGE database for transcript discovery on male germ cell development</b>                              | T.-L.Lee, H.-H.Cheung, J.Claus, C.Sastry, S.Singh, L.Vu, O.Rennert and W.-Y.Chan                                                                                                                                                                                                                                                                                                                             | D891–D897 |
|          | <b>Implementation of GenePattern within the Stanford Microarray Database</b>                                                       | J.Hubble, J.Demeter, H.Jin, M.Mao, M.Nitzberg, T.B.K.Reddy, F.Wymore, Z.K.Zachariah, G.Sherlock and C.A.Ball                                                                                                                                                                                                                                                                                                 | D898–D901 |
|          | <b>MAPU 2.0: high-accuracy proteomes mapped to genomes</b>                                                                         | F.Gnad, M.Oroshi, E.Birney and M.Mann                                                                                                                                                                                                                                                                                                                                                                        | D902–D906 |
|          | <b>Sys-BodyFluid: a systematical database for human body fluid proteome research</b>                                               | S.-J.Li, M.Peng, H.Li, B.-S.Liu, C.Wang, J.-R.Wu, Y.-X.Li and R.Zeng                                                                                                                                                                                                                                                                                                                                         | D907–D912 |
|          | <b>SysPIMP: the web-based systematical platform for identifying human disease-related mutated sequences from mass spectrometry</b> | H.Xi, J.Park, G.Ding, Y.-H.Lee and Y.Li                                                                                                                                                                                                                                                                                                                                                                      | D913–D920 |

*Continued*

|          |                                                                                                                                            |                                                                                                                                                                       |             |
|----------|--------------------------------------------------------------------------------------------------------------------------------------------|-----------------------------------------------------------------------------------------------------------------------------------------------------------------------|-------------|
|          | <b>Déjà vu: a database of highly similar citations in the scientific literature</b>                                                        | M.Errami, Z.Sun, T.C.Long, A.C.George and H.R.Garner                                                                                                                  | D921–D924   |
|          | <b>Cell Line Data Base: structure and recent improvements towards molecular authentication of human cell lines</b>                         | P.Romano, A.Manniello, O.Aresu, M.Armento, M.Cesaro and B.Parodi                                                                                                      | D925–D932   |
| <b>S</b> | <b>APD2: the updated antimicrobial peptide database and its application in peptide design</b>                                              | G.Wang, X.Li and Z.Wang                                                                                                                                               | D933–D937   |
|          | <b>OligoArrayDb: pangenomic oligonucleotide microarray probe sets database</b>                                                             | J.-M.Rouillard and E.Gulari                                                                                                                                           | D938–D941   |
|          | <b>RTPrimerDB: the portal for real-time PCR primers and probes</b>                                                                         | S.Lefever, J.Vandesompele, F.Speleman and F.Pattyn                                                                                                                    | D942–D945   |
|          | <b>GOBASE: an organelle genome database</b>                                                                                                | E.A.O'Brien, Y.Zhang, E.Wang, V.Marie, W.Badejoko, B.F.Lang and G.Burger                                                                                              | D946–D950   |
|          | <b>AutoSNPdb: an annotated single nucleotide polymorphism database for crop plants</b>                                                     | C.Duran, N.Appleby, T.Clark, D.Wood, M.Imelfort, J.Batley and D.Edwards                                                                                               | D951–D953   |
|          | <b>GabiPD: the GABI primary database—a plant integrative 'omics' database</b>                                                              | D.M.Riaño-Pachón, A.Nagel, J.Neigenfind, R.Wagner, R.Basekow, E.Weber, B.Mueller-Roeber, S.Diehl and B.Kersten                                                        | D954–D959   |
|          | <b>P<sup>3</sup>DB: a plant protein phosphorylation database</b>                                                                           | J.Gao, G.K.Agrawal, J.J.Thelen and D.Xu                                                                                                                               | D960–D962   |
|          | <b>PhytAMP: a database dedicated to antimicrobial plant peptides</b>                                                                       | R.Hammami, J.B.Hamida, G.Vergoten and I.Fliss                                                                                                                         | D963–D968   |
| <b>S</b> | <b>PPDB, the Plant Proteomics Database at Cornell</b>                                                                                      | Q.Sun, B.Zybailov, W.Majeran, G.Friso, P.D.B.Olinares and K.J.van Wijk                                                                                                | D969–D974   |
| <b>S</b> | <b>Arabidopsis Hormone Database: a comprehensive genetic and phenotypic information database for plant hormone research in Arabidopsis</b> | Z.-y.Peng, X.Zhou, L.Li, X.Yu, H.Li, Z.Jiang, G.Cao, M.Bai, X.Wang, C.Jiang, H.Lu, X.Hou, L.Qu, Z.Wang, J.Zuo, X.Fu, Z.Su, S.Li and H.Guo                             | D975–D982   |
|          | <b>AthaMap, integrating transcriptional and post-transcriptional data</b>                                                                  | L.Bülöw, S.Engelmann, M.Schindler and R.Hehl                                                                                                                          | D983–D986   |
|          | <b>ATTED-II provides coexpressed gene networks for Arabidopsis</b>                                                                         | T.Obayashi, S.Hayashi, M.Saeki, H.Ohta and K.Kinoshita                                                                                                                | D987–D991   |
|          | <b>OryGenesDB 2008 update: database interoperability for functional genomics of rice</b>                                                   | G.Droc, C.Périn, S.Fromentin and P.Larmande                                                                                                                           | D992–D995   |
|          | <b>RiceGeneThresher: a web-based application for mining genes underlying QTL in rice genome</b>                                            | S.Thongjuea, V.Ruanjaichon, R.Bruskiewich and A.Vanavichit                                                                                                            | D996–D1000  |
|          | <b>Update of the Diatom EST Database: a new tool for digital transcriptomics</b>                                                           | U.Maheswari, T.Mock, E.V.Armbrust and C.Bowler                                                                                                                        | D1001–D1005 |
|          | <b>IMGT<sup>®</sup>, the international ImMunoGeneTics information system<sup>®</sup></b>                                                   | M.-P.Lefranc, V.Giudicelli, C.Ginestoux, J.Jabado-Michaloud, G.Folch, F.Bellahcene, Y.Wu, E.Gemrot, X.Brochet, J.Lane, L.Regnier, F.Ehrenmann, G.Lefranc and P.Duroux | D1006–D1012 |
|          | <b>The IMGT/HLA database</b>                                                                                                               | J.Robinson, M.J.Waller, S.C.Fail, H.McWilliam, R.Lopez, P.Parham and S.G.E.Marsh                                                                                      | D1013–D1017 |
| <b>S</b> | <b>The HuRef Browser: a web resource for individual human genomics</b>                                                                     | N.Axelrod, Y.Lin, P.C.Ng, T.B.Stockwell, J.Crabtree, J.Huang, E.Kirkness, R.L.Strausberg, M.E.Frazier, J.C.Venter, S.Kravitz and S.Levy                               | D1018–D1024 |
|          | <b>The YH database: the first Asian diploid genome database</b>                                                                            | G.Li, L.Ma, C.Song, Z.Yang, X.Wang, H.Huang, Y.Li, R.Li, X.Zhang, H.Yang, J.Wang and J.Wang                                                                           | D1025–D1028 |
